# Supplementary material for: Differences in and verification of genetic alterations in chemotherapy and immunotherapy for metastatic melanoma
Source: publisher site journal article supplement (doi:10.18632/aging.203640), 2021-10-21
Supplement: Supplementary file [file aging-v13i20-203640-supplementary-material-SD2.pdf]

## SUPPLEMENTARY TABLES

Supplementary Table 1. Primers of signature genes.

| Symbols | Forward primers (5' → 3') | Reverse primers (5' → 3') | Amplicon size |
|---------|---------------------------|---------------------------|---------------|
| CCKBR   | GGGACACGAGAATTGGAGCTG     | AACCGCCTTGCAGATGACG       | 249           |
| ITGA10  | AACATCACCCACGCCTATTCC     | GTTGGTAGTCACCTAAGTGGC     | 207           |
| KCNJ11  | AGGTCCAAGTGACTATTGGCT     | TCTGCACGATGAGGATCAGGA     | 81            |
| IGFBP1  | TTGGGACGCCATCAGTACCTA     | TTGGCTAAACTCTCTACGACTCT   | 114           |
| NMU     | CTCAGGCATCCAACGCACT       | GACTTGCCCAACTTCTGTGTC     | 136           |
| CEACAM  | CTGTCCAATGACAACAGGACC     | ACGGTAATAGGTGTATGAGGGG    | 174           |
| MMP13   | ACTGAGAGGCTCCGAGAAATG     | GAACCCCGCATCTTGGCTT       | 103           |

**Supplementary Table 2. 50 important genes screened through PPI network.**

| Symbols | Gene names                                                | log2 Fold Change | P value  | PMID     | Function                                                  |
|---------|-----------------------------------------------------------|------------------|----------|----------|-----------------------------------------------------------|
| KLK3    | kallikrein related peptidase 3                            | 5.400            | 2.52E-23 | 10218588 | angiogenesis                                              |
| SLC17A6 | solute carrier family 17 member 6                         | -4.658           | 6.89E-20 | 10820226 | amino acid transmembrane transport                        |
| CHRNA1  | cholinergic receptor nicotinic alpha 1 subunit            | 3.543            | 2.64E-12 | 10195214 | action potential                                          |
| DLK1    | delta like non-canonical Notch ligand 1                   | -4.428           | 5.84E-12 | 10354070 | molecular_function                                        |
| SFTPA2  | surfactant protein A2                                     | 3.575            | 6.19E-12 | 10781424 | activation of innate immune response                      |
| FCER1G  | Fc fragment of IgE receptor Ig                            | 1.968            | 2.59E-10 | 10049942 | cell activation                                           |
| KRT14   | keratin 14                                                | -3.028           | 5.63E-10 | 10583131 | molecular_function                                        |
| SFN     | stratifin                                                 | -2.655           | 3.62E-09 | 10524633 | cell cycle checkpoint                                     |
| ORM1    | orosomucoid 1                                             | 2.314            | 5.94E-09 | 11027547 | cell activation                                           |
| COL17A1 | collagen type XVII alpha 1 chain                          | -2.405           | 7.51E-09 | 10022517 | immune system process                                     |
| LMO1    | LIM domain only 1                                         | -2.211           | 1.28E-08 | 10603358 | negative regulation of transcription by RNA polymerase II |
| COL6A5  | collagen type VI alpha 5 chain                            | 2.158            | 1.78E-08 | 14702039 | molecular_function                                        |
| CCKBR   | cholecystokinin B receptor                                | 1.682            | 7.36E-08 | 10100325 | peptide receptor activity                                 |
| ITGA10  | integrin subunit alpha 10                                 | 2.459            | 1.05E-07 | 10702680 | molecular_function                                        |
| KCNJ11  | potassium voltage-gated channel subfamily J member 11     | 1.682            | 1.19E-07 | 10093054 | nucleotide binding                                        |
| EREG    | epiregulin                                                | 2.476            | 2.06E-07 | 10681561 | reproduction                                              |
| GABRB2  | gamma-aminobutyric acid type A receptor beta2 subunit     | 1.984            | 2.93E-07 | 10023064 | system process                                            |
| ADCY8   | adenylate cyclase 8                                       | 2.718            | 3.09E-07 | 10075700 | nucleotide binding                                        |
| KRT16   | keratin 16                                                | -2.625           | 4.24E-07 | 10521820 | ameboidal-type cell migration                             |
| NRXN1   | neurexin 1                                                | -2.371           | 4.33E-07 | 11036064 | cell morphogenesis                                        |
| THBS1   | thrombospondin 1                                          | 1.612            | 4.47E-07 | 101549   | MAPK cascade                                              |
| IGFBP1  | insulin like growth factor binding protein 1              | 1.507            | 7.07E-07 | 10329650 | regulation of cell growth                                 |
| LIF     | LIF interleukin 6 family cytokine                         | 2.101            | 8.01E-07 | 10205054 | reproduction                                              |
| XAGE2   | X antigen family member 2                                 | 2.286            | 2.59E-06 | 10197611 | molecular_function                                        |
| NLGN3   | neuroligin 3                                              | -1.557           | 3.51E-06 | 10767552 | cell morphogenesis                                        |
| CACNA1B | calcium voltage-gated channel subunit alpha 1 B           | -2.042           | 4.21E-06 | 10455105 | nucleotide binding                                        |
| KLRD1   | killer cell lectin like receptor D1                       | 1.584            | 4.30E-06 | 10023772 | natural killer cell mediated immunity                     |
| CXCR6   | C-X-C motif chemokine receptor 6                          | 1.541            | 5.16E-06 | 10590105 | G protein-coupled chemoattractant receptor activity       |
| SYT3    | synaptotagmin 3                                           | -1.794           | 7.08E-06 | 10531343 | cell morphogenesis                                        |
| MCHR1   | melanin concentrating hormone receptor 1                  | 2.294            | 1.78E-05 | 10421367 | peptide receptor activity                                 |
| CTSG    | cathepsin G                                               | 1.907            | 1.96E-05 | 10512690 | lytic vacuole                                             |
| IVL     | involucrin                                                | -2.015           | 2.22E-05 | 10908733 | cornified envelope                                        |
| KRT5    | keratin 5                                                 | -2.084           | 2.25E-05 | 10234505 | molecular_function                                        |
| NMU     | neuromedin U                                              | -1.514           | 2.61E-05 | 10783389 | temperature homeostasis                                   |
| KRT6C   | keratin 6C                                                | -2.036           | 3.51E-05 | 11683385 | molecular_function                                        |
| SAGE1   | sarcoma antigen 1                                         | 1.560            | 3.65E-05 | 10919659 | cellular_component                                        |
| LRRTM1  | leucine rich repeat transmembrane neuronal 1              | -1.967           | 5.79E-05 | 12477932 | regulation of receptor internalization                    |
| TCN1    | transcobalamin 1                                          | 1.801            | 8.91E-05 | 11373332 | transition metal ion transport                            |
| TEX15   | testis expressed 15, meiosis and synapsis associated      | -1.854           | 0.000    | 11279525 | reproduction                                              |
| CXCL9   | C-X-C motif chemokine ligand 9                            | 1.541            | 0.000    | 10201891 | syncytium formation by plasma membrane fusion             |
| CCL20   | C-C motif chemokine ligand 20                             | 1.584            | 0.000    | 10064080 | G protein-coupled receptor binding                        |
| MMP1    | matrix metalloproteinase 1                                | -1.752           | 0.001    | 10224132 | immune system process                                     |
| DDX43   | DEAD-box helicase 43                                      | -1.587           | 0.001    | 10919659 | nucleotide binding                                        |
| CEACAM5 | carcinoembryonic antigen related cell adhesion molecule 5 | -1.590           | 0.002    | 10436421 | immune system process                                     |
| CXCL5   | C-X-C motif chemokine ligand 5                            | 1.666            | 0.002    | 10068592 | molecular_function                                        |
| GRIA2   | glutamate ionotropic receptor AMPA type subunit 2         | 1.586            | 0.003    | 10027300 | amyloid-beta binding                                      |
| VEGF    | VEGF nerve growth factor inducible                        | 1.554            | 0.004    | 10381005 | reproduction                                              |
| CCL21   | C-C motif chemokine ligand 21                             | -1.513           | 0.008    | 10201891 | MAPK cascade                                              |
| MMP13   | matrix metalloproteinase 13                               | 1.533            | 0.008    | 10074939 | skeletal system development                               |
| EDN3    | endothelin 3                                              | 1.997            | 0.009    | 10231870 | MAPK cascade                                              |
